# Supplementary material
Source: PubMed Central journal article supplement (PMC4018948)
Supplement: jn.113.182048_nutrition182048SupplementaryData1.pdf [file jn.113.182048_nutrition182048SupplementaryData1.pdf]

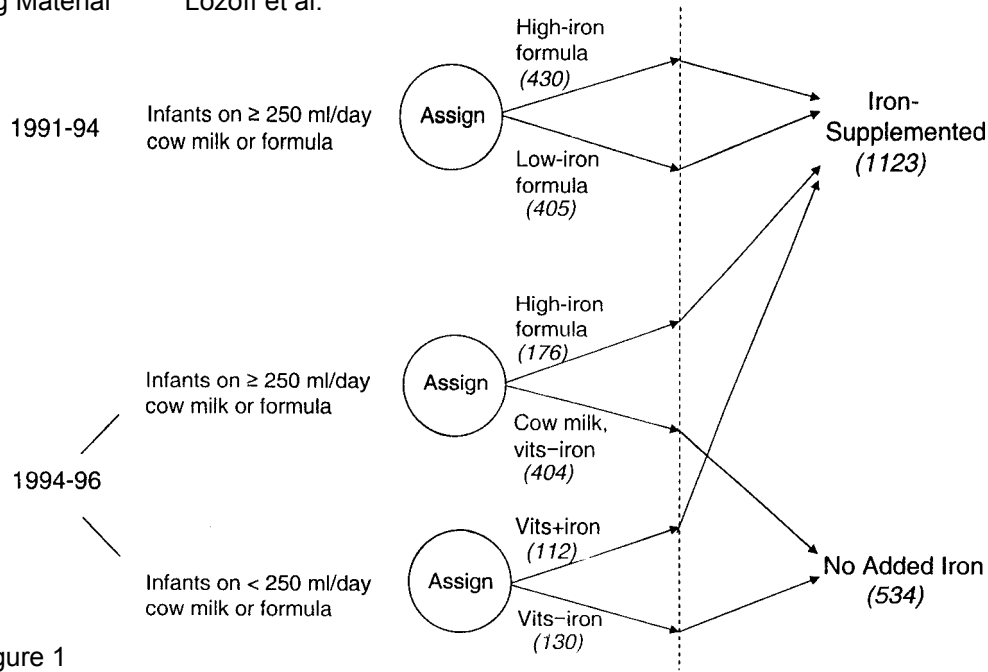

Supplemental Figure 1

**Fig 1.** Changes in study design. Attrition after group assignment (dotted line) was 7.8%. Of the final sample of 1657 infants who completed the study, 835 were enrolled in the initial phase, and 822 were enrolled thereafter. Analyses of behavioral and developmental outcome compared all infants who received iron (the iron-supplemented group) with those who did not (the no-added-iron group). *N*'s in each original group and the final analysis are shown in parentheses.
