# Supplementary material
Source: PubMed Central journal article supplement (PMC4018948)
Supplement: jn.113.182048_nutrition182048SupplementaryData2.pdf [file jn.113.182048_nutrition182048SupplementaryData2.pdf]

Supplemental Table 1. Factors and loadings from principal components factor analysis of Behavior and Attitude Checklist.

| Item                                                                                           | Factor loadings <sup>1</sup> - varimax rotation |              |             |              |             |          |
|------------------------------------------------------------------------------------------------|-------------------------------------------------|--------------|-------------|--------------|-------------|----------|
|                                                                                                | Factor 1                                        | Factor 2     | Factor 3    | Factor 4     | Factor 5    | Factor 6 |
| Reaction to praise: accepts praise gracefully (1) <sup>2</sup> to accepts praise awkwardly (7) | <b>0.72</b>                                     | -0.07        | 0.13        | 0.30         | -0.07       | 0.10     |
| Cooperative (1) to not cooperative (7)                                                         | <b>0.72</b>                                     | 0.15         | 0.12        | 0.16         | 0.02        | 0.11     |
| Reaction to praise: works hard after praise (1) to retreats after praise (7)                   | <b>0.67</b>                                     | -0.27        | -0.01       | 0.02         | 0.13        | -0.10    |
| Reaction to failure: works harder after failure (1) to gives up easily after failure (7)       | <b>0.66</b>                                     | 0.19         | 0.16        | -0.10        | 0.16        | 0.10     |
| Confident (1) to not confident (7)                                                             | <b>0.55</b>                                     | -0.13        | 0.08        | 0.45         | 0.23        | 0.29     |
| Does not give up easily (1) to gives up easily(7)                                              | <b>0.46</b>                                     | 0.36         | 0.26        | 0.01         | 0.26        | 0.16     |
| Calm (1) to hyperactive (7)                                                                    | 0.19                                            | <b>0.77</b>  | 0.11        | 0.06         | 0.11        | -0.18    |
| Passive (1) to aggressive(7)                                                                   | 0.12                                            | <b>0.70</b>  | -0.04       | 0.12         | -0.21       | -0.08    |
| Work habits: Deliberate (1) to impulsive (7)                                                   | 0.16                                            | <b>0.69</b>  | 0.18        | -0.08        | 0.21        | -0.33    |
| Only speaks when spoken to (1) to converses spontaneously (7)                                  | -0.33                                           | <b>0.67</b>  | -0.25       | 0.02         | 0.02        | -0.11    |
| Thinks silently (1) to thinks aloud (7)                                                        | -0.09                                           | <b>0.55</b>  | -0.06       | 0.23         | -0.02       | 0.13     |
| Articulate language (1) to inarticulate language (7)                                           | -0.06                                           | 0.07         | <b>0.80</b> | -0.05        | 0.14        | 0.03     |
| Responses direct (1) to responses vague(7)                                                     | 0.17                                            | -0.10        | <b>0.79</b> | 0.10         | 0.04        | 0.11     |
| Speech good (1) to speech poor (7)                                                             | 0.24                                            | -0.21        | <b>0.70</b> | 0.00         | 0.12        | 0.15     |
| Reality-oriented language (1) to bizarre language (7)                                          | 0.10                                            | 0.17         | <b>0.66</b> | -0.08        | -0.01       | 0.03     |
| Reaction to failure: calm after failure (1) to agitated after failure (7)                      | 0.32                                            | 0.16         | 0.02        | <b>0.69</b>  | -0.04       | 0.10     |
| Accepting of own work (1) to critical of own work (7)                                          | 0.17                                            | 0.18         | -0.09       | <b>0.69</b>  | 0.08        | 0.12     |
| Relaxed(1) to tense(7)                                                                         | 0.19                                            | -0.31        | 0.33        | <b>0.51</b>  | 0.14        | 0.09     |
| Reaction to failure: aware of failure (1) to unaware of failure (7)                            | 0.30                                            | 0.03         | 0.21        | <b>-0.53</b> | 0.17        | 0.20     |
| Reaction to failure: apologetic after the failure (1) to not apologetic after the failure (7)  | 0.11                                            | <b>-0.47</b> | -0.04       | <b>-0.60</b> | 0.04        | -0.01    |
| Good motor coordination (1) to defective motor coordination (7)                                | 0.00                                            | -0.10        | 0.11        | 0.04         | <b>0.84</b> | 0.01     |
| Skillful movements (1) to awkward movements (7)                                                | 0.15                                            | 0.01         | 0.08        | 0.06         | <b>0.80</b> | 0.09     |
| Careful and systematic (1) to trial-and-error (7)                                              | 0.42                                            | 0.26         | 0.10        | -0.13        | <b>0.48</b> | 0.35     |
| Neat (1) to careless (7)                                                                       | 0.40                                            | 0.44         | 0.07        | -0.19        | <b>0.47</b> | 0.06     |

Online Supporting Material

|                                                  |      |       |      |      |      |             |
|--------------------------------------------------|------|-------|------|------|------|-------------|
| Reaction time fast (1) to reaction time slow (7) | 0.13 | -0.13 | 0.13 | 0.06 | 0.10 | <b>0.86</b> |
| Work habits: fast (1) to slow (7)                | 0.13 | -0.16 | 0.15 | 0.12 | 0.08 | <b>0.86</b> |
| Eigenvalue                                       | 5.43 | 3.59  | 2.47 | 1.75 | 1.50 | 1.24        |
| Variance explained by each factor (%)            | 3.38 | 3.35  | 2.67 | 2.35 | 2.16 | 2.05        |
| Cronbach's alpha                                 | 0.78 | 0.75  | 0.75 | 0.63 | 0.73 | 0.84        |

<sup>1</sup> Bolded factor loadings indicate which items load onto each factor with a loading of > 0.45, per Comrey AL, Lee HB. A First Course in Factor Analysis (2<sup>nd</sup> Edition). Hillsdale, NJ: Lawrence Erlbaum Associates, 1992.

<sup>2</sup> Numbers in parentheses indicate lowest to highest ratings on items.
