# Supplementary material
Source: PubMed Central journal article supplement (PMC4018948)
Supplement: jn.113.182048_nutrition182048SupplementaryData3.pdf [file jn.113.182048_nutrition182048SupplementaryData3.pdf]

Supplemental Table 2. CBCL and CHIP-CE *T*-scores in 10-year-old children who did or did not receive supplemental iron in infancy.<sup>1</sup>

| <i>T</i> -scores             | Iron-supplemented | No-added-iron | <i>P</i> -value <sup>2</sup> | Significant covariates                                             |
|------------------------------|-------------------|---------------|------------------------------|--------------------------------------------------------------------|
| <b>CBCL</b>                  |                   |               |                              |                                                                    |
| Withdrawn                    | 62.9 ± 0.4        | 63.6 ± 0.5    | 0.30                         | birth weight, intensity of breastfeeding, <sup>3</sup> maternal IQ |
| Somatic complaints           | 61.6 ± 0.3        | 61.7 ± 0.4    | 1.00                         | maternal IQ                                                        |
| Anxious/depressed            | 63.4 ± 0.4        | 62.9 ± 0.5    | 0.46                         | child gender, maternal IQ                                          |
| Social problems              | 61.7 ± 0.3        | 61.6 ± 0.5    | 0.73                         | child gender                                                       |
| Thought problems             | 58.8 ± 0.3        | 58.3 ± 0.4    | 0.31                         | maternal IQ                                                        |
| Attention problems           | 61.8 ± 0.4        | 61.7 ± 0.5    | 0.93                         | intensity of breastfeeding, maternal IQ                            |
| Delinquent behavior          | 57.0 ± 0.3        | 57.6 ± 0.4    | 0.29                         | maternal IQ                                                        |
| Aggressive behavior          | 59.9 ± 0.4        | 60.5 ± 0.5    | 0.41                         | intensity of breastfeeding, maternal IQ                            |
| Total problems               | 63.0 ± 0.4        | 63.2 ± 0.5    | 0.81                         | intensity of breastfeeding, maternal IQ                            |
| Internalizing                | 64.7 ± 0.4        | 64.8 ± 0.5    | 0.81                         | child gender, intensity of breastfeeding, maternal IQ              |
| Externalizing                | 58.3 ± 0.4        | 58.7 ± 0.6    | 0.66                         | intensity of breastfeeding, maternal IQ                            |
| <b>CHIP-CE Child Report</b>  |                   |               |                              |                                                                    |
| Satisfaction                 | 46.8 ± 0.4        | 46.2 ± 0.5    | 0.32                         |                                                                    |
| Comfort                      | 48.1 ± 0.3        | 47.7 ± 0.5    | 0.46                         | child age, maternal IQ                                             |
| Resilience                   | 46.4 ± 0.4        | 46.3 ± 0.5    | 0.80                         | child gender, intensity of breastfeeding                           |
| Risk avoidance               | 44.0 ± 0.4        | 43.8 ± 0.5    | 0.75                         | child gender                                                       |
| Achievement                  | 41.5 ± 0.4        | 41.6 ± 0.5    | 0.96                         |                                                                    |
| <b>CHIP-CE Parent Report</b> |                   |               |                              |                                                                    |
| Satisfaction                 | 44.1 ± 0.5        | 44.0 ± 0.7    | 0.92                         |                                                                    |
| Comfort                      | 43.4 ± 0.5        | 43.3 ± 0.7    | 0.88                         | maternal IQ                                                        |
| Resilience                   | 42.4 ± 0.4        | 44.5 ± 0.7    | 0.01                         | child age, child gender, intensity of breastfeeding, maternal IQ   |
| Risk avoidance               | 46.2 ± 0.4        | 45.8 ± 0.6    | 0.62                         | child gender                                                       |
| Achievement                  | 42.0 ± 0.4        | 42.4 ± 0.6    | 0.64                         | maternal IQ                                                        |

<sup>1</sup> Values are covariate adjusted means ± SE.<sup>2</sup> Based on multiple regression.<sup>3</sup> As indexed by ml per day of cow milk or formula.
